# Supplementary material
Source: Springer Nature journal article supplement (https://www.springermedizin.de/resource/supplementary/13012_2009_221_MOESM5_ESM.pdf/9629632)

1. What is our list of problems in the practice?
2. Which shall we deal with first?
  - a. Hint: Choose an 'easier win' first
3. What exactly is wrong?
  - a. Whose problem is it?
  - b. What are the issues?
  - c. What needs to change?
  - d. Where do we want to get to?
  - e. What are our goals?
4. What are the options for dealing with the problem?
  - a. Brainstorm options
5. What are the 'pros' and 'cons' of each option?
6. What is the best way forward?
7. What exactly do we have to do?

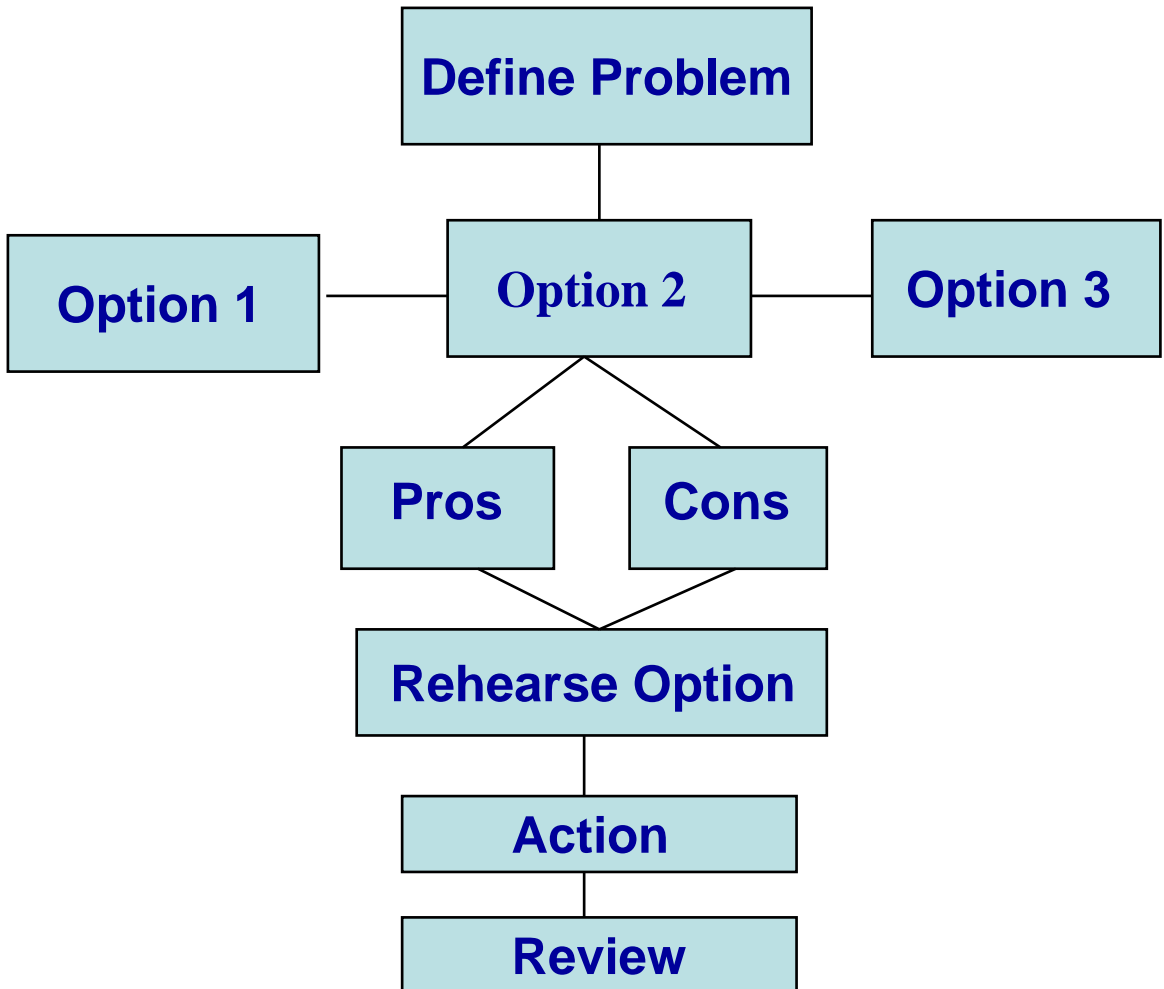

Supplement: MOESM5 [file 9629632]
